# Supplementary material
Source: Springer Nature journal article supplement (https://www.springermedizin.de/resource/supplementary/13046_2008_91_MOESM7_ESM.pdf/9661684)

■ M14 CTR  
■ M14 E5

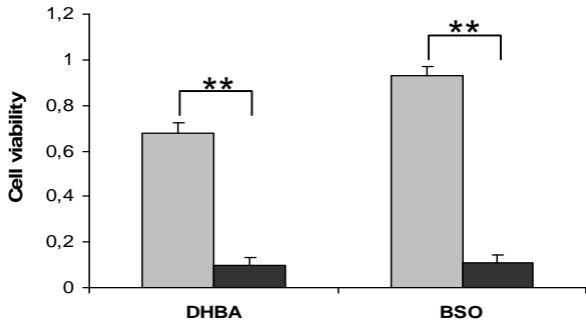

Supplement: MOESM7 [file 9661684]
